# Supplementary material for: Sensitivity of Estimated Tacrolimus Population Pharmacokinetic Profile to Inaccurate Assumptions about Dose Timing and Absorption: An Investigation in Real-World and Simulated Data
Source: bioRxiv or medRxiv preprint supplement (doi:10.1101/2021.01.15.21249900), 2021-05-08
Supplement: Supplementary file [file media-1.pdf]

**Table S1. Simulation Results from 200 repetitions of a total of 24 scenarios: two PK profiles (SEL, FEL), two scenarios of variability (LV, HV), three observation designs (FO, 3T, TR), and two last-dose times (AD, TD).** Simulation results are presented as medians, 10 to 90 percentiles in square brackets, and percent bias in parentheses. The  $k_e$ ,  $CL$ , and  $V$  represent population PK parameters for elimination rate constant, clearance, and volume of distribution respectively. The  $\omega_{CL}$  and  $\omega_V$  are the between-subject variance components for clearance and volume of distribution, presented as %CV. The  $\sigma_{prop}$  and  $\sigma_{add}$  represent the proportional and additive residual errors in the combined residual error model, presented as %CV and the standard deviation, respectively. True underlying parameters are shown in **Table 1**.

| Design           | Dose Timing       | PK Profile       | Variability            | CL                           | V                            | $k_e$               | $\omega_{CL}$ (%CV) | $\omega_V$ (%CV)    | $\sigma_{prop}$ (%CV) | $\sigma_{add}$ (ng/ml) |
|------------------|-------------------|------------------|------------------------|------------------------------|------------------------------|---------------------|---------------------|---------------------|-----------------------|------------------------|
| Full Observation | True Dose-Time    | Fast Elimination | High Variability       | 0.20<br>[0.20,0.20]          | 2.02<br>[1.96,2.08]          | 0.10<br>[0.10,0.10] | 0.29<br>[0.27,0.31] | 0.29<br>[0.26,0.32] | 0.30<br>[0.30,0.31]   | 4.45<br>[4.00,4.84]    |
|                  |                   |                  | Low Variability        | 0.20<br>[0.20,0.20]          | 2.00<br>[1.99,2.01]          | 0.10<br>[0.10,0.10] | 0.05<br>[0.04,0.05] | 0.05<br>[0.04,0.05] | 0.96<br>[0.86,1.11]   |                        |
|                  |                   |                  | 22.63<br>[22.11,23.29] | 1137.55<br>[1063.65,1212.92] | 0.02<br>[0.02,0.02]          | 0.30<br>[0.27,0.32] | 0.30<br>[0.23,0.37] | 0.46<br>[0.29,0.53] |                       |                        |
|                  |                   | Slow Elimination | High Variability       | 22.71<br>[22.61,22.81]       | 1092.09<br>[1079.00,1104.90] | 0.02<br>[0.02,0.02] | 0.05<br>[0.04,0.05] | 0.06<br>[0.04,0.07] | 0.05<br>[0.04,0.06]   | 0.10<br>[0.05,0.14]    |
|                  |                   |                  | Low Variability        | 0.24<br>[0.24,0.25]          | 1.96<br>[1.91,2.02]          | 0.12<br>[0.12,0.13] | 0.35<br>[0.32,0.37] | 0.27<br>[0.25,0.30] | 0.33<br>[0.32,0.33]   | 5.72<br>[5.18,6.26]    |
|                  |                   |                  | 0.24<br>[0.24,0.24]    | 1.92<br>[1.91,1.94]          | 0.06<br>[0.06,0.06]          | 0.06<br>[0.01,0.02] | 0.16<br>[0.16,0.16] | 0.00<br>[0.00,0.00] |                       |                        |
|                  | Assumed Dose-Time | Fast Elimination | High Variability       | 23.47<br>[22.85,24.12]       | 1151.01<br>[1084.72,1225.55] | 0.02<br>[0.02,0.02] | 0.31<br>[0.28,0.33] | 0.30<br>[0.23,0.38] | 0.30<br>[0.29,0.31]   | 0.47<br>[0.39,0.53]    |
|                  |                   |                  | Low Variability        | 23.46<br>[23.35,23.57]       | 1099.61<br>[1086.89,1114.54] | 0.02<br>[0.02,0.02] | 0.05<br>[0.05,0.05] | 0.06<br>[0.04,0.07] | 0.06<br>[0.05,0.06]   | 0.06<br>[0.01,0.10]    |
|                  |                   |                  | 0.20<br>[0.20,0.20]    | 2.03<br>[1.95,2.11]          | 0.10<br>[0.10,0.10]          | 0.28<br>[0.25,0.30] | 0.31<br>[0.22,0.30] | 4.25<br>[3.65,4.88] |                       |                        |
|                  |                   | Slow Elimination | High Variability       | 22.63<br>[21.97,23.27]       | 1148.26<br>[1037.89,1268.59] | 0.02<br>[0.02,0.02] | 0.29<br>[0.27,0.32] | 0.34<br>[0.25,0.44] | 0.30<br>[0.28,0.32]   | 0.46<br>[0.33,0.57]    |
|                  |                   |                  | Low Variability        | 22.70<br>[22.60,22.82]       | 1091.94<br>[1073.77,1114.99] | 0.02<br>[0.02,0.02] | 0.05<br>[0.04,0.05] | 0.07<br>[0.05,0.09] | 0.05<br>[0.04,0.06]   | 0.08<br>[0.02,0.16]    |
|                  |                   |                  | 0.26<br>[0.25,0.26]    | 2.51<br>[2.42,2.58]          | 0.10<br>[0.10,0.11]          | 0.25<br>[0.33,0.38] | 0.32<br>[0.22,0.29] | 4.85<br>[4.26,5.57] |                       |                        |
| 3 Hour + Trough  | True Dose-Time    | Fast Elimination | High Variability       | 0.25<br>[0.25,0.25]          | 2.40<br>[2.38,2.42]          | 0.11<br>[0.10,0.11] | 0.06<br>[0.06,0.06] | 0.02<br>[0.01,0.02] | 0.11<br>[0.11,0.12]   | 1.54<br>[1.22,1.86]    |
|                  |                   |                  | Low Variability        | 23.43<br>[22.78,24.12]       | 1190.57<br>[1090.01,1315.11] | 0.02<br>[0.02,0.02] | 0.31<br>[0.28,0.33] | 0.35<br>[0.25,0.44] | 0.30<br>[0.28,0.32]   | 0.45<br>[0.34,0.58]    |
|                  |                   |                  | 23.49<br>[23.38,23.60] | 1130.15<br>[1112.99,1154.41] | 0.02<br>[0.02,0.02]          | 0.05<br>[0.05,0.05] | 0.07<br>[0.05,0.09] | 0.08<br>[0.04,0.06] |                       |                        |
|                  | Assumed Dose-Time | Fast Elimination | High Variability       | 0.20<br>[0.19,0.22]          | 2.06<br>[1.83,2.43]          | 0.10<br>[0.09,0.11] | 0.25<br>[0.22,0.27] | 0.22<br>[0.16,0.29] | 0.31<br>[0.30,0.33]   | 3.94<br>[3.27,4.79]    |
|                  |                   |                  | Low Variability        | 0.20<br>[0.20,0.20]          | 2.00<br>[1.95,2.05]          | 0.10<br>[0.10,0.10] | 0.04<br>[0.03,0.04] | 0.04<br>[0.03,0.05] | 1.00<br>[0.04,0.06]   |                        |
|                  |                   |                  | 22.24<br>[21.34,23.05] | 1114.17<br>[827.93,1401.64]  | 0.02<br>[0.02,0.03]          | 0.28<br>[0.25,0.31] | 0.30<br>[0.34,0.59] | 0.46<br>[0.27,0.34] |                       |                        |
| Trough           | True Dose-Time    | Slow Elimination | High Variability       | 22.68<br>[22.44,23.01]       | 1103.43<br>[1004.29,1233.25] | 0.02<br>[0.02,0.02] | 0.04<br>[0.04,0.05] | 0.17<br>[0.12,0.20] | 0.05<br>[0.02,0.06]   | 0.09<br>[0.00,0.26]    |
|                  |                   |                  | Low Variability        | 0.24<br>[0.22,0.26]          | 2.17<br>[1.64,2.82]          | 0.11<br>[0.09,0.13] | 0.28<br>[0.25,0.31] | 0.30<br>[0.23,0.40] | 0.32<br>[0.30,0.33]   | 5.08<br>[4.23,6.06]    |
|                  |                   |                  | 0.21<br>[0.20,0.22]    | 1.48<br>[1.32,1.61]          | 0.14<br>[0.13,0.15]          | 0.03<br>[0.02,0.04] | 0.07<br>[0.05,0.09] | 0.60<br>[0.01,3.29] |                       |                        |
|                  | Assumed Dose-Time | Fast Elimination | High Variability       | 22.58<br>[21.41,23.45]       | 953.64<br>[684.68,1241.30]   | 0.02<br>[0.02,0.03] | 0.28<br>[0.25,0.31] | 0.53<br>[0.40,0.67] | 0.30<br>[0.28,0.33]   | 0.46<br>[0.26,0.62]    |
|                  |                   |                  | Low Variability        | 23.26<br>[22.91,23.61]       | 1066.20<br>[915.55,1220.93]  | 0.02<br>[0.02,0.03] | 0.04<br>[0.04,0.05] | 0.05<br>[0.16,0.28] | 0.10<br>[0.02,0.06]   |                        |
|                  |                   |                  | 22.58<br>[21.41,23.45] | 953.64<br>[684.68,1241.30]   | 0.02<br>[0.02,0.03]          | 0.28<br>[0.25,0.31] | 0.53<br>[0.40,0.67] | 0.30<br>[0.28,0.33] | 0.46<br>[0.26,0.62]   |                        |

**Table S2. Simulation Results from 200 repetitions of a total of 36 scenarios: two PK profiles (SEL, FEL), two scenarios of variability (LV, HV), three observation designs (FO, 3T, TR), and three assumed values for  $k_a$  (True  $k_a$ ,  $k_a \times 10$ ,  $k_a / 10$ ).** Simulation results are presented as medians, 10 to 90 percentiles in square brackets, and percent bias in parentheses. The  $k_e$ ,  $CL$ , and  $V$  represent population PK parameters for elimination rate constant, clearance, and volume of distribution respectively. The  $\omega_{CL}$  and  $\omega_V$  are the between-subject variance components for clearance and volume of distribution, presented as %CV. The  $\sigma_{prop}$  and  $\sigma_{add}$  represent the proportional and additive residual errors in the combined residual error model, presented as %CV and the standard deviation, respectively. True underlying parameters are shown in **Table 1**.

| Design           | PK profile       | Variability      | Fixed $k_a$     | $CL$ (L/h)                         | $V$ (L)                                 | $k_e$                            | $\omega_{CL}$ (%CV)             | $\omega_V$ (%CV)                 | $\sigma_{prop}$ (%CV)             | $\sigma_{add}$ (ng/ml)            |                                 |
|------------------|------------------|------------------|-----------------|------------------------------------|-----------------------------------------|----------------------------------|---------------------------------|----------------------------------|-----------------------------------|-----------------------------------|---------------------------------|
| Full Observation | Fast Elimination | High Variability | True $k_a$      | 0.20<br>[0.20,0.20]<br>(0.00%)     | 2.04<br>[1.98,2.10]<br>(1.87%)          | 0.10<br>[0.09,0.10]<br>(-1.99%)  | 0.30<br>[0.28,0.32]<br>(-1.00%) | 0.30<br>[0.28,0.33]<br>(0.67%)   | 0.30<br>[0.30,0.31]<br>(0.33%)    | 4.63<br>[4.01,5.38]<br>(-7.37%)   |                                 |
|                  |                  |                  | $k_a \times 10$ | 0.20<br>[0.19,0.20]<br>(-1.50%)    | 2.67<br>[2.61,2.77]<br>(33.75%)         | 0.07<br>[0.07,0.08]<br>(-26.23%) | 0.29<br>[0.27,0.31]<br>(-2.67%) | 0.31<br>[0.28,0.34]<br>(3.67%)   | 0.33<br>[0.32,0.34]<br>(9.33%)    | 2.92<br>[2.18,3.70]<br>(-41.51%)  |                                 |
|                  |                  |                  | $k_a / 10$      | 0.20<br>[0.20,0.21]<br>(0.00%)     | 0.19<br>[0.19,0.20]<br>(-90.35%)        | 1.04<br>[0.99,1.08]<br>(935.90%) | 0.30<br>[0.28,0.32]<br>(0.33%)  | 0.40<br>[0.35,0.44]<br>(32.67%)  | 0.30<br>[0.30,0.31]<br>(1.33%)    | 5.05<br>[4.23,5.95]<br>(1.00%)    |                                 |
|                  |                  | Low Variability  | True $k_a$      | 0.20<br>[0.20,0.20]<br>(0.00%)     | 2.00<br>[1.99,2.01]<br>(0.05%)          | 0.10<br>[0.10,0.10]<br>(-0.10%)  | 0.05<br>[0.05,0.05]<br>(-2.00%) | 0.05<br>[0.04,0.05]<br>(-2.00%)  | 0.05<br>[0.05,0.05]<br>(0.00%)    | 0.05<br>[0.05,0.05]<br>(0.00%)    | 0.99<br>[0.77,1.18]<br>(-1.10%) |
|                  |                  |                  | $k_a \times 10$ | 0.20<br>[0.20,0.20]<br>(-1.00%)    | 2.59<br>[2.57,2.60]<br>(29.40%)         | 0.08<br>[0.08,0.08]<br>(-23.66%) | 0.05<br>[0.04,0.05]<br>(-8.00%) | 0.02<br>[0.02,0.03]<br>(-54.00%) | 0.10<br>[0.10,0.10]<br>(102.00%)  | 0.00<br>[0.00,0.00]<br>(-100.00%) |                                 |
|                  |                  |                  | $k_a / 10$      | 0.20<br>[0.20,0.20]<br>(0.00%)     | 0.20<br>[0.20,0.20]<br>(-90.00%)        | 1.00<br>[1.00,1.01]<br>(900.00%) | 0.05<br>[0.05,0.05]<br>(0.00%)  | 0.06<br>[0.05,0.07]<br>(18.00%)  | 0.05<br>[0.05,0.05]<br>(-2.00%)   | 1.22<br>[1.02,1.43]<br>(22.35%)   |                                 |
|                  | Slow Elimination | High Variability | True $k_a$      | 22.61<br>[21.96,23.21]<br>(-0.41%) | 1140.13<br>[1077.56,1205.87]<br>(4.60%) | 0.02<br>[0.02,0.02]<br>(-5.05%)  | 0.30<br>[0.28,0.32]<br>(0.33%)  | 0.31<br>[0.22,0.37]<br>(3.83%)   | 0.30<br>[0.29,0.31]<br>(1.33%)    | 0.46<br>[0.39,0.53]<br>(-8.70%)   |                                 |
|                  |                  |                  | $k_a \times 10$ | 22.50<br>[21.84,23.09]<br>(-0.87%) | 1168.46<br>[1101.49,1237.95]<br>(7.20%) | 0.02<br>[0.02,0.02]<br>(-7.54%)  | 0.30<br>[0.28,0.32]<br>(0.17%)  | 0.30<br>[0.23,0.37]<br>(1.67%)   | 0.30<br>[0.29,0.31]<br>(1.33%)    | 0.46<br>[0.39,0.52]<br>(-8.80%)   |                                 |
|                  |                  |                  | $k_a / 10$      | 22.55<br>[21.91,23.11]<br>(-0.68%) | 827.86<br>[743.68,932.42]<br>(-24.05%)  | 0.03<br>[0.02,0.03]<br>(29.86%)  | 0.30<br>[0.28,0.32]<br>(0.00%)  | 0.46<br>[0.35,0.59]<br>(53.67%)  | 0.30<br>[0.29,0.32]<br>(1.33%)    | 0.50<br>[0.42,0.57]<br>(-0.90%)   |                                 |
|                  |                  | Low Variability  | True $k_a$      | 22.70<br>[22.59,22.79]<br>(0.00%)  | 1092.74<br>[1081.33,1104.30]<br>(0.25%) | 0.02<br>[0.02,0.02]<br>(-0.27%)  | 0.05<br>[0.05,0.05]<br>(0.00%)  | 0.06<br>[0.04,0.08]<br>(20.00%)  | 0.05<br>[0.04,0.06]<br>(1.00%)    | 0.09<br>[0.05,0.14]<br>(-6.00%)   |                                 |
|                  |                  |                  | $k_a \times 10$ | 22.60<br>[22.49,22.69]<br>(-0.44%) | 1128.54<br>[1115.35,1139.60]<br>(3.54%) | 0.02<br>[0.02,0.02]<br>(-3.77%)  | 0.05<br>[0.05,0.05]<br>(0.00%)  | 0.06<br>[0.04,0.07]<br>(16.00%)  | 0.05<br>[0.04,0.06]<br>(2.00%)    | 0.09<br>[0.05,0.14]<br>(-10.50%)  |                                 |
|                  |                  |                  | $k_a / 10$      | 22.65<br>[22.54,22.75]<br>(-0.22%) | 760.05<br>[744.25,784.20]<br>(-30.27%)  | 0.03<br>[0.03,0.03]<br>(43.05%)  | 0.05<br>[0.05,0.05]<br>(-2.00%) | 0.07<br>[0.05,0.08]<br>(32.00%)  | 0.00<br>[0.00,0.00]<br>(-100.00%) | 0.64<br>[0.63,0.64]<br>(536.00%)  |                                 |

| Design             | PK profile          | Variability         | Fixed $k_o$     | CL (L/h)                           | V (L)                                    | $k_e$                             | $\omega_{CL}$ (%CV)             | $\omega_V$ (%CV)                 | $\sigma_{prop}$ (%CV)          | $\sigma_{add}$ (ng/ml)           |
|--------------------|---------------------|---------------------|-----------------|------------------------------------|------------------------------------------|-----------------------------------|---------------------------------|----------------------------------|--------------------------------|----------------------------------|
| 3 Hour +<br>Trough | Fast<br>Elimination | High<br>Variability | True $k_o$      | 0.20<br>[0.19,0.21]<br>(0.00%)     | 2.04<br>[1.99,2.12]<br>(2.15%)           | 0.10<br>[0.09,0.10]<br>(-2.29%)   | 0.29<br>[0.27,0.31]<br>(-3.33%) | 0.29<br>[0.26,0.32]<br>(-2.67%)  | 0.30<br>[0.29,0.31]<br>(1.00%) | 4.59<br>[3.57,5.43]<br>(-8.21%)  |
|                    |                     |                     | $k_o \times 10$ | 0.19<br>[0.18,0.19]<br>(-6.00%)    | 2.04<br>[1.98,2.12]<br>(1.90%)           | 0.09<br>[0.09,0.09]<br>(-7.82%)   | 0.28<br>[0.26,0.30]<br>(-7.00%) | 0.30<br>[0.27,0.33]<br>(0.33%)   | 0.30<br>[0.29,0.31]<br>(0.83%) | 4.59<br>[3.65,5.52]<br>(-8.28%)  |
|                    |                     |                     | $k_o / 10$      | 0.20<br>[0.19,0.20]<br>(-1.50%)    | 0.15<br>[0.12,0.18]<br>(-92.53%)         | 1.30<br>[1.08,1.67]<br>(1202.32%) | 0.30<br>[0.28,0.32]<br>(-1.00%) | 0.73<br>[0.57,0.94]<br>(144.00%) | 0.31<br>[0.30,0.32]<br>(2.33%) | 5.14<br>[3.91,6.29]<br>(2.87%)   |
|                    |                     | Low<br>Variability  | True $k_o$      | 0.20<br>[0.20,0.20]<br>(0.00%)     | 2.00<br>[1.99,2.01]<br>(0.05%)           | 0.10<br>[0.10,0.10]<br>(-0.10%)   | 0.05<br>[0.04,0.05]<br>(-4.00%) | 0.05<br>[0.04,0.05]<br>(-6.00%)  | 0.05<br>[0.05,0.05]<br>(2.00%) | 0.94<br>[0.68,1.18]<br>(-6.20%)  |
|                    |                     |                     | $k_o \times 10$ | 0.19<br>[0.19,0.19]<br>(-5.50%)    | 2.01<br>[2.00,2.02]<br>(0.30%)           | 0.09<br>[0.09,0.09]<br>(-6.06%)   | 0.05<br>[0.04,0.05]<br>(-8.00%) | 0.05<br>[0.04,0.05]<br>(-4.00%)  | 0.05<br>[0.05,0.05]<br>(2.00%) | 0.94<br>[0.68,1.17]<br>(-6.50%)  |
|                    |                     |                     | $k_o / 10$      | 0.20<br>[0.20,0.20]<br>(-0.50%)    | 0.19<br>[0.18,0.19]<br>(-90.60%)         | 1.06<br>[1.03,1.09]<br>(958.51%)  | 0.05<br>[0.05,0.05]<br>(-2.00%) | 0.24<br>[0.20,0.26]<br>(373.00%) | 0.05<br>[0.05,0.05]<br>(0.00%) | 1.07<br>[0.84,1.35]<br>(7.50%)   |
|                    | Slow<br>Elimination | High<br>Variability | True $k_o$      | 22.54<br>[21.91,23.13]<br>(-0.69%) | 1167.74<br>[1067.91,1297.50]<br>(7.13%)  | 0.02<br>[0.02,0.02]<br>(-7.47%)   | 0.30<br>[0.28,0.32]<br>(0.33%)  | 0.35<br>[0.26,0.46]<br>(16.67%)  | 0.31<br>[0.28,0.33]<br>(1.83%) | 0.44<br>[0.30,0.59]<br>(-11.80%) |
|                    |                     |                     | $k_o \times 10$ | 22.40<br>[21.77,22.97]<br>(-1.34%) | 1163.79<br>[1053.54,1282.06]<br>(6.77%)  | 0.02<br>[0.02,0.02]<br>(-7.56%)   | 0.30<br>[0.28,0.32]<br>(-0.33%) | 0.35<br>[0.27,0.45]<br>(17.67%)  | 0.31<br>[0.28,0.33]<br>(2.00%) | 0.44<br>[0.29,0.59]<br>(-11.60%) |
|                    |                     |                     | $k_o / 10$      | 22.67<br>[22.02,23.24]<br>(-0.12%) | 582.35<br>[521.76,668.53]<br>(-46.57%)   | 0.04<br>[0.03,0.04]<br>(85.65%)   | 0.29<br>[0.27,0.32]<br>(-2.00%) | 0.39<br>[0.30,0.53]<br>(31.33%)  | 0.31<br>[0.28,0.33]<br>(2.17%) | 0.43<br>[0.28,0.58]<br>(-13.80%) |
|                    |                     | Low<br>Variability  | True $k_o$      | 22.69<br>[22.59,22.79]<br>(-0.03%) | 1094.52<br>[1075.98,1113.57]<br>(0.41%)  | 0.02<br>[0.02,0.02]<br>(-0.53%)   | 0.05<br>[0.05,0.05]<br>(0.00%)  | 0.07<br>[0.05,0.10]<br>(46.00%)  | 0.05<br>[0.04,0.06]<br>(2.00%) | 0.09<br>[0.02,0.16]<br>(-7.00%)  |
|                    |                     |                     | $k_o \times 10$ | 22.55<br>[22.45,22.65]<br>(-0.65%) | 1088.20<br>[1069.74,1108.19]<br>(-0.17%) | 0.02<br>[0.02,0.02]<br>(-0.52%)   | 0.05<br>[0.05,0.05]<br>(-2.00%) | 0.07<br>[0.06,0.10]<br>(44.00%)  | 0.05<br>[0.04,0.06]<br>(2.00%) | 0.09<br>[0.02,0.16]<br>(-7.50%)  |
|                    |                     |                     | $k_o / 10$      | 22.67<br>[22.56,22.76]<br>(-0.15%) | 510.93<br>[503.33,520.70]<br>(-53.13%)   | 0.04<br>[0.04,0.05]<br>(112.73%)  | 0.05<br>[0.04,0.05]<br>(-2.00%) | 0.07<br>[0.05,0.09]<br>(40.00%)  | 0.05<br>[0.04,0.06]<br>(2.00%) | 0.09<br>[0.02,0.16]<br>(-9.00%)  |

| Design           | PK profile       | Variability      | Fixed $k_a$      | CL (L/h)         | V (L)            | $k_e$       | $\omega_{CL}$ (%CV) | $\omega_V$ (%CV) | $\sigma_{prop}$ (%CV) | $\sigma_{add}$ (ng/ml) |
|------------------|------------------|------------------|------------------|------------------|------------------|-------------|---------------------|------------------|-----------------------|------------------------|
| Trough           | Fast Elimination | High Variability | True $k_a$       | 0.21             | 2.41             | 0.09        | 0.26                | 0.30             | 0.30                  | 4.48                   |
|                  |                  |                  |                  | [0.19,0.23]      | [1.82,3.28]      | [0.07,0.10] | [0.23,0.29]         | [0.23,0.39]      | [0.28,0.32]           | [3.09,5.83]            |
|                  |                  |                  |                  | (5.00%)          | (20.63%)         | (-12.98%)   | (-14.00%)           | (0.50%)          | (1.67%)               | (-10.49%)              |
|                  |                  | $k_a \times 10$  | 0.20             | 2.43             | 0.08             | 0.25        | 0.29                | 0.30             | 4.50                  |                        |
|                  |                  |                  | [0.18,0.22]      | [1.82,3.16]      | [0.07,0.10]      | [0.22,0.28] | [0.21,0.38]         | [0.28,0.32]      | [3.08,5.88]           |                        |
|                  |                  |                  | (-0.50%)         | (21.30%)         | (-18.29%)        | (-16.67%)   | (-3.50%)            | (1.67%)          | (-9.95%)              |                        |
|                  | Slow Elimination | High Variability | True $k_a$       | 0.26             | 1.17             | 0.23        | 0.34                | 0.79             | 0.30                  | 4.52                   |
|                  |                  |                  |                  | [0.24,0.28]      | [0.65,1.89]      | [0.15,0.37] | [0.31,0.37]         | [0.58,1.11]      | [0.28,0.32]           | [3.05,5.96]            |
|                  |                  |                  |                  | (31.00%)         | (-41.73%)        | (127.96%)   | (13.17%)            | (162.17%)        | (1.50%)               | (-9.54%)               |
|                  |                  | Low Variability  | 0.18             | 1.54             | 0.12             | 0.03        | 0.07                | 0.05             | 0.93                  |                        |
|                  |                  |                  | [0.18,0.19]      | [1.40,1.70]      | [0.11,0.13]      | [0.02,0.04] | [0.05,0.09]         | [0.03,0.06]      | [0.02,2.89]           |                        |
|                  |                  |                  | (-9.00%)         | (-22.75%)        | (18.14%)         | (-36.00%)   | (34.00%)            | (2.00%)          | (-7.05%)              |                        |
| $k_a \times 10$  | 0.17             | 1.55             | 0.11             | 0.03             | 0.06             | 0.05        | 0.93                |                  |                       |                        |
|                  | [0.16,0.18]      | [1.43,1.71]      | [0.10,0.12]      | [0.02,0.04]      | [0.04,0.08]      | [0.03,0.06] | [0.02,2.95]         |                  |                       |                        |
|                  | (-14.50%)        | (-22.38%)        | (9.93%)          | (-38.00%)        | (22.00%)         | (2.00%)     | (-6.80%)            |                  |                       |                        |
| Trough           | Fast Elimination | High Variability | True $k_a$       | 0.27             | 1.44             | 0.19        | 0.05                | 0.24             | 0.05                  | 0.94                   |
|                  |                  |                  |                  | [0.26,0.28]      | [1.17,1.87]      | [0.15,0.22] | [0.04,0.05]         | [0.17,0.32]      | [0.03,0.06]           | [0.03,2.91]            |
|                  |                  |                  |                  | (35.00%)         | (-28.00%)        | (88.07%)    | (-4.00%)            | (382.00%)        | (2.00%)               | (-6.35%)               |
|                  |                  | $k_a / 10$       | 21.69            | 944.38           | 0.02             | 0.27        | 0.54                | 0.31             | 0.43                  |                        |
|                  |                  |                  | [20.57,22.61]    | [653.61,1314.86] | [0.02,0.03]      | [0.24,0.30] | [0.41,0.70]         | [0.28,0.33]      | [0.25,0.61]           |                        |
|                  |                  |                  | (-4.43%)         | (-13.36%)        | (11.33%)         | (-9.50%)    | (78.33%)            | (1.83%)          | (-13.30%)             |                        |
|                  | Slow Elimination | High Variability | True $k_a$       | 21.50            | 947.79           | 0.02        | 0.27                | 0.53             | 0.30                  | 0.44                   |
|                  |                  |                  |                  | [20.43,22.49]    | [646.95,1256.16] | [0.02,0.03] | [0.24,0.30]         | [0.41,0.67]      | [0.28,0.33]           | [0.26,0.61]            |
|                  |                  |                  |                  | (-5.30%)         | (-13.05%)        | (10.25%)    | (-10.00%)           | (77.17%)         | (1.50%)               | (-13.00%)              |
|                  |                  | $k_a \times 10$  | 22.89            | 811.86           | 0.03             | 0.29        | 0.61                | 0.30             | 0.43                  |                        |
|                  |                  |                  | [21.85,23.83]    | [519.30,1279.97] | [0.02,0.04]      | [0.26,0.32] | [0.48,0.80]         | [0.28,0.33]      | [0.25,0.61]           |                        |
|                  |                  |                  | (0.82%)          | (-25.52%)        | (35.60%)         | (-4.00%)    | (104.00%)           | (1.00%)          | (-13.10%)             |                        |
| Slow Elimination | Low Variability  | True $k_a$       | 22.54            | 1052.08          | 0.02             | 0.04        | 0.21                | 0.05             | 0.09                  |                        |
|                  |                  |                  | [22.12,22.82]    | [883.92,1190.57] | [0.02,0.03]      | [0.04,0.05] | [0.16,0.27]         | [0.02,0.06]      | [0.00,0.29]           |                        |
|                  |                  |                  | (-0.69%)         | (-3.48%)         | (2.87%)          | (-15.00%)   | (327.00%)           | (2.00%)          | (-6.00%)              |                        |
|                  | $k_a \times 10$  | 22.43            | 1059.12          | 0.02             | 0.04             | 0.21        | 0.05                | 0.09             |                       |                        |
|                  |                  | [22.01,22.69]    | [896.54,1180.71] | [0.02,0.02]      | [0.04,0.05]      | [0.16,0.26] | [0.02,0.06]         | [0.00,0.29]      |                       |                        |
|                  |                  | (-1.17%)         | (-2.83%)         | (1.76%)          | (-14.00%)        | (312.00%)   | (2.00%)             | (-6.00%)         |                       |                        |
| $k_a / 10$       | 23.67            | 975.26           | 0.02             | 0.05             | 0.31             | 0.05        | 0.10                |                  |                       |                        |
|                  | [23.39,23.89]    | [811.05,1145.94] | [0.02,0.03]      | [0.04,0.05]      | [0.23,0.40]      | [0.02,0.06] | [0.00,0.29]         |                  |                       |                        |
|                  | (4.26%)          | (-10.53%)        | (16.48%)         | (-6.00%)         | (519.00%)        | (1.00%)     | (-0.50%)            |                  |                       |                        |
